# Supplementary material for: N-Methyl-2-pyrrolidone-promoted crystallization of MEL zeolite and its acceleration mechanism
Source: Royal Society of Chemistry journal article supplement (doi:10.1039/d0ta08107h), 2020-01-01
Supplement: d0ta08107h1.pdf [file d0ta08107h1.pdf]

## Supporting Information

### ***N*-methyl-2-pyrrolidone-promoted crystallization of MEL zeolite and its acceleration mechanism**

Chuanyu Yang <sup>a,b,1</sup>, Dongpu Zhao <sup>a,b,1</sup>, Weifeng Chu<sup>a</sup>, Yanan Wang <sup>a,b</sup>, Xiujie Li <sup>a</sup>, Sujuan Xie <sup>a</sup>, Wenjie Xin

<sup>a</sup>, Xiangxue Zhu <sup>a,\*</sup>, Shenglin Liu <sup>a,\*</sup> and Longya Xu <sup>a,\*</sup>

<sup>a</sup> *State Key Laboratory of Catalysis, Dalian Institute of Chemical Physics, Chinese Academy of Sciences,*

*Dalian 116023, Liaoning, PR China*

<sup>b</sup> *University of Chinese Academy of Sciences, Beijing 100049, PR China*

\* Corresponding author. E-mail address: zhuxx@dicp.ac.cn

\* Corresponding author. E-mail address: slliu@dicp.ac.cn

\* Corresponding author. E-mail address: lyxu@dicp.ac.cn

<sup>1</sup> Equally contributed to this work.

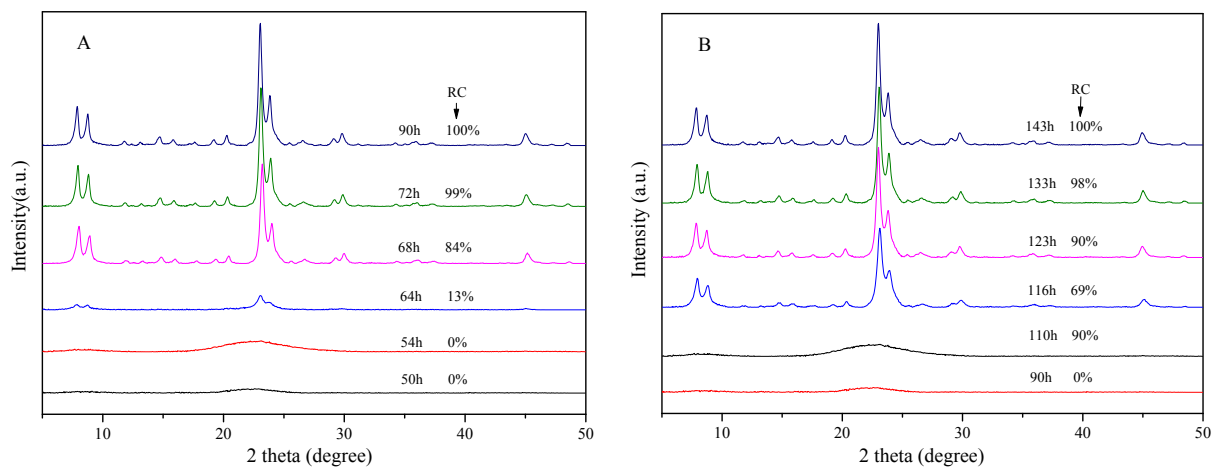

**Fig. S1** XRD patterns of the samples synthesized (A) with NMP and (B) without NMP for different time.

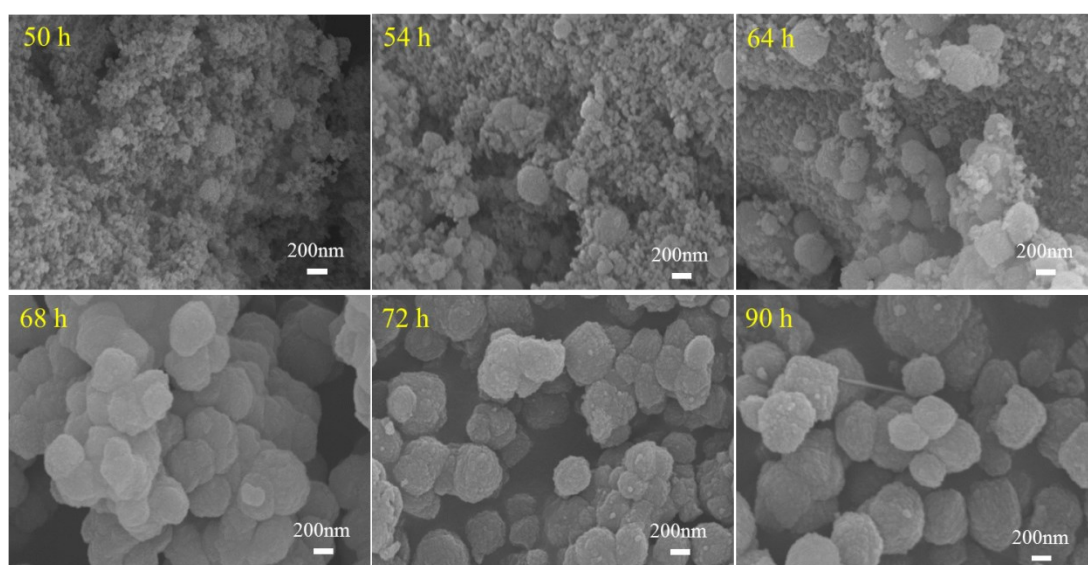

**Fig. S2** SEM images of samples crystallized at 130 °C for different periods of time with NMP/SiO<sub>2</sub> molar ratio of 1.5.

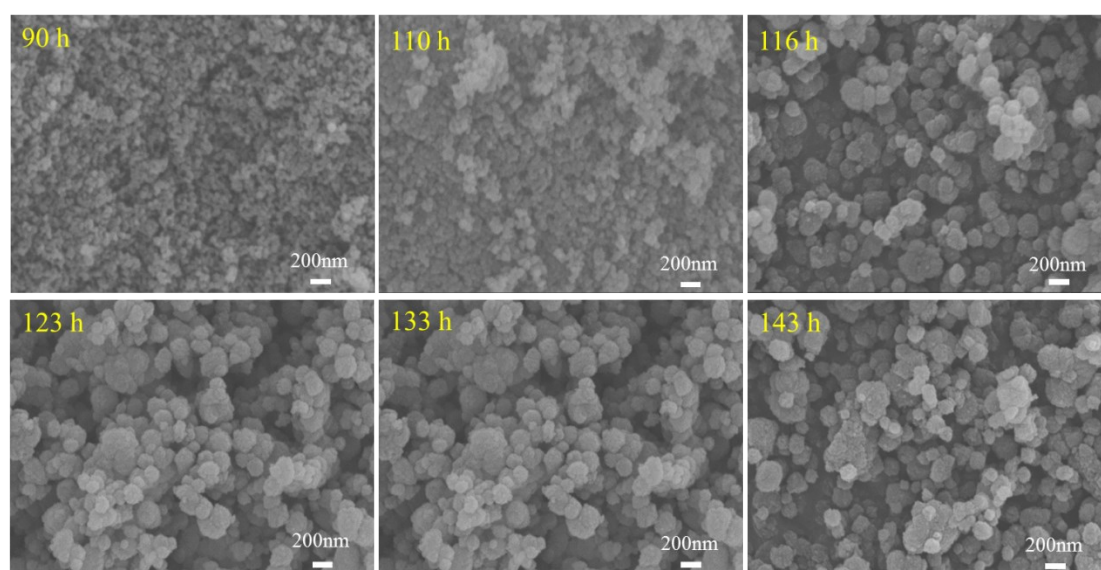

**Fig. S3** SEM images of samples crystallized at 130 °C for different periods of time with NMP/SiO<sub>2</sub> molar ratio of 0.0.

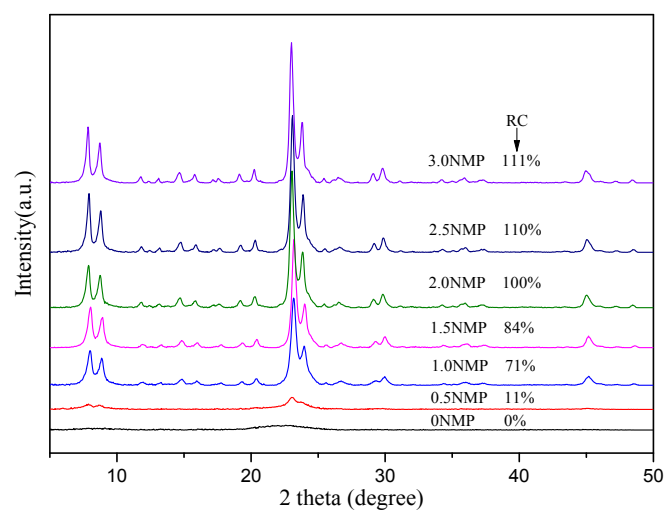

**Fig. S4** XRD patterns of samples crystallized at 130 °C for 68 h with different ratios of NMP/SiO<sub>2</sub>.

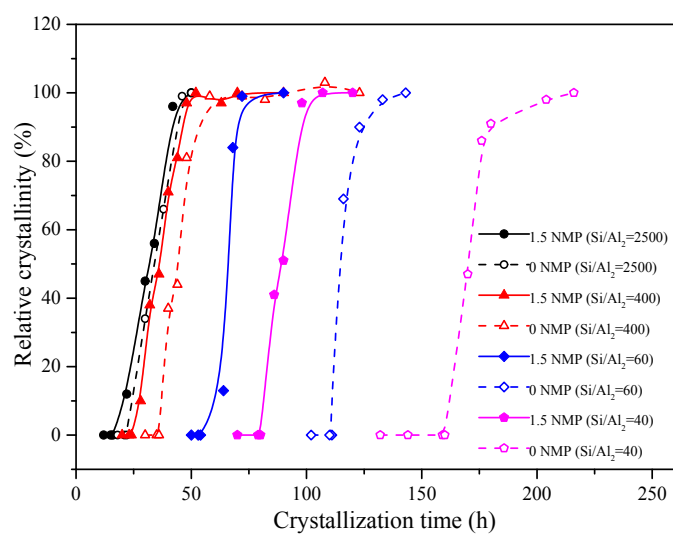

**Fig. S5** Crystallization curves of zeolite ZSM-11 synthesized with different Si/Al<sub>2</sub> molar ratios at 130 °C.

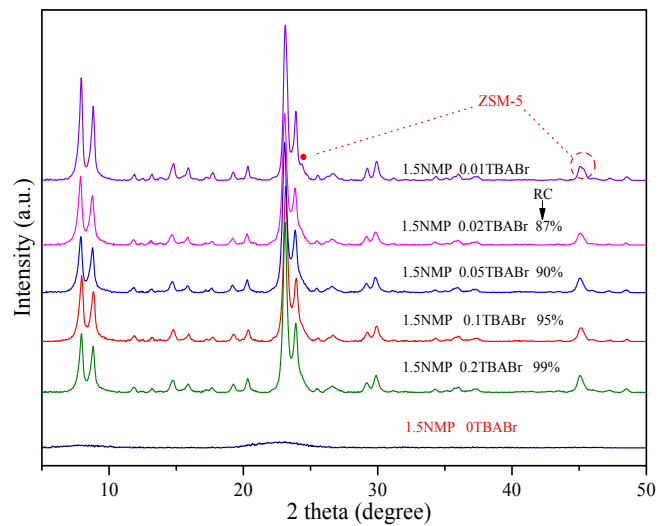

**Fig. S6** XRD patterns of samples prepared with different ratios of TBABr/SiO<sub>2</sub>.

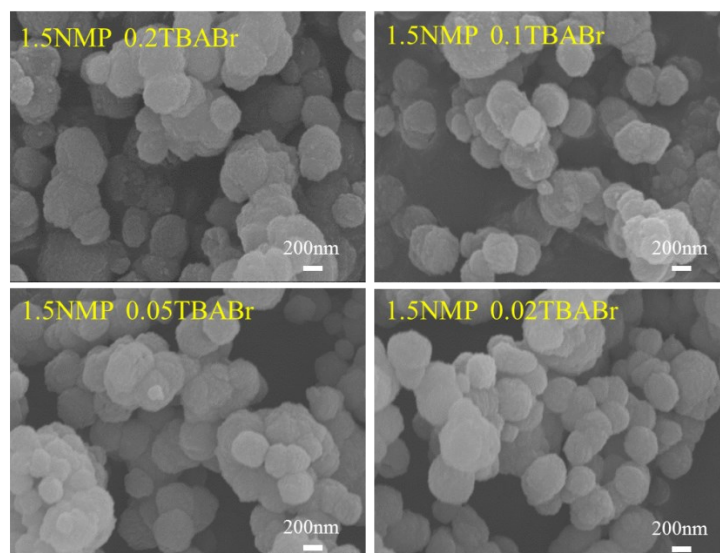

**Fig. S7** SEM images of samples prepared with different ratios of TBABr/SiO<sub>2</sub>.

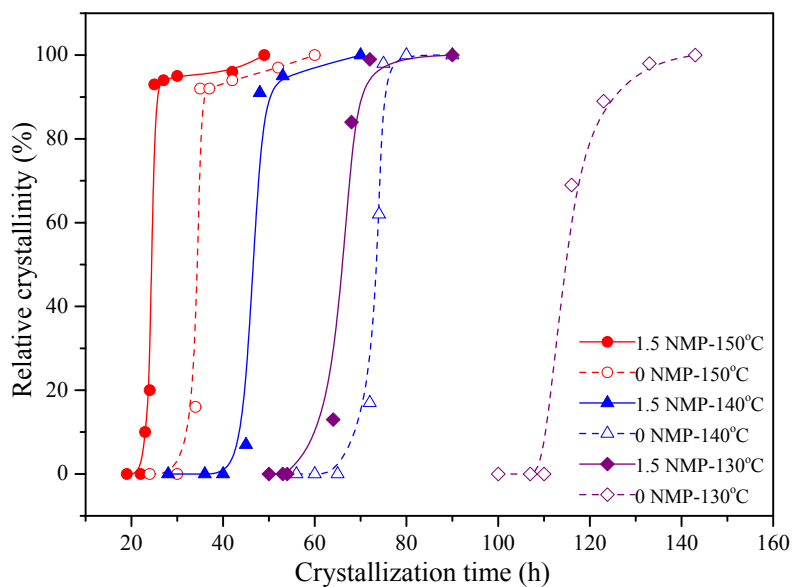

**Fig. S8** Crystallization curves of zeolite ZSM-11 synthesized with and without NMP at different temperature.

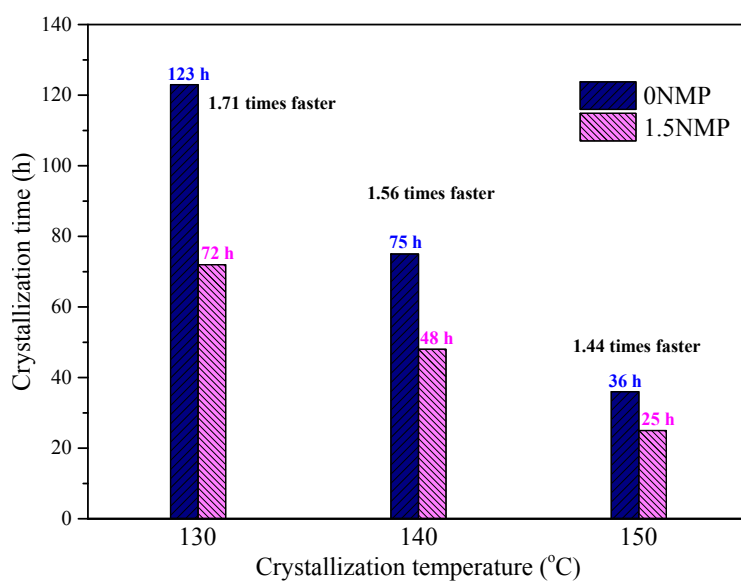

**Fig. S9** Crystallization temperature dependence of acceleration effect of NMP.

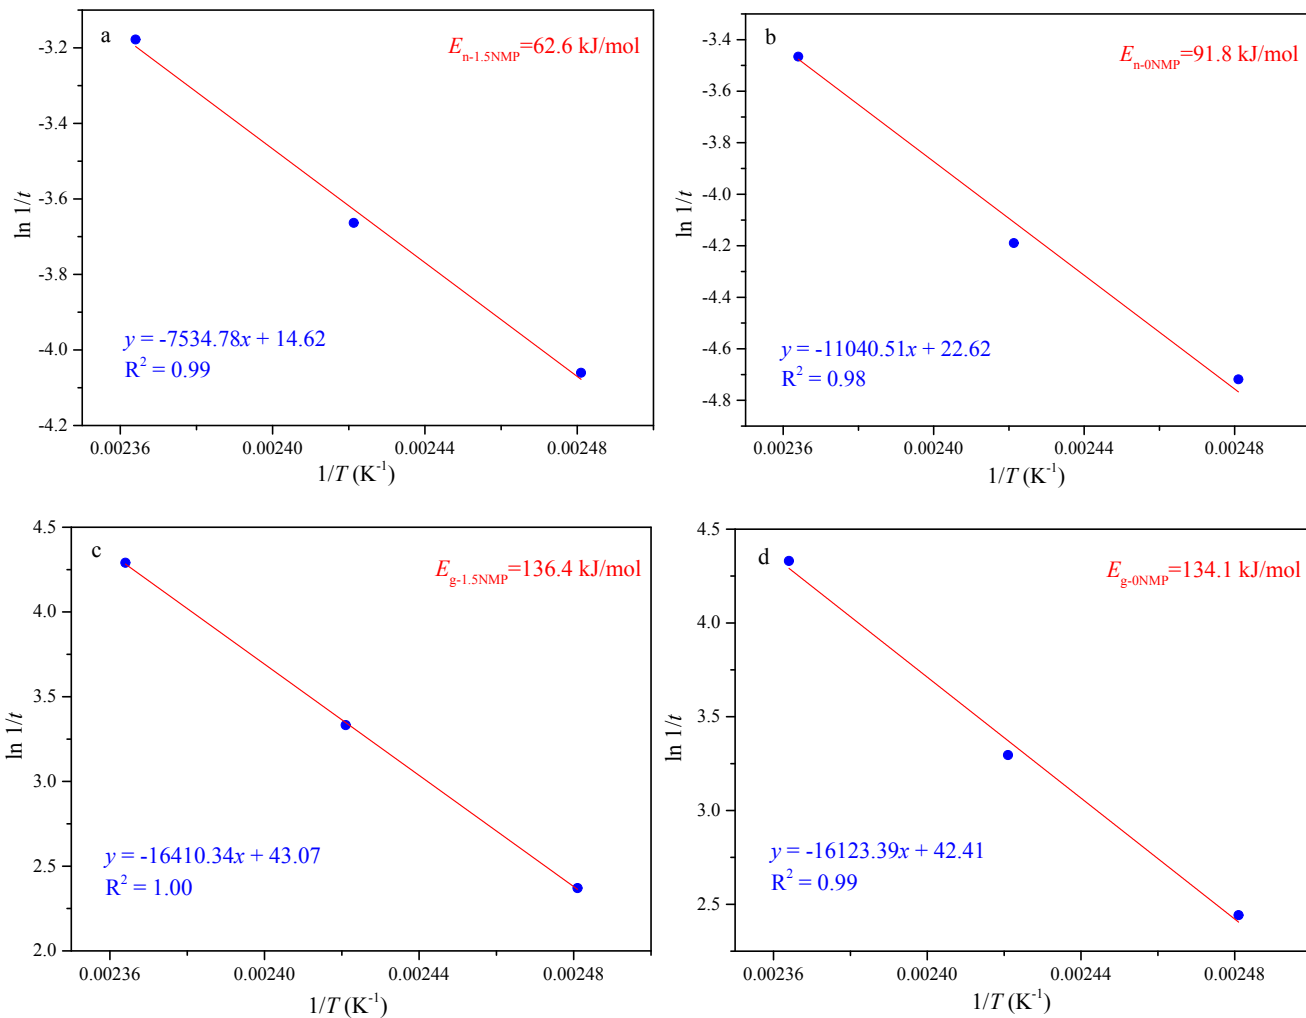

**Fig. S10** Arrhenius plot for the synthesis of ZSM-11 zeolite using TBABr as the organic template.

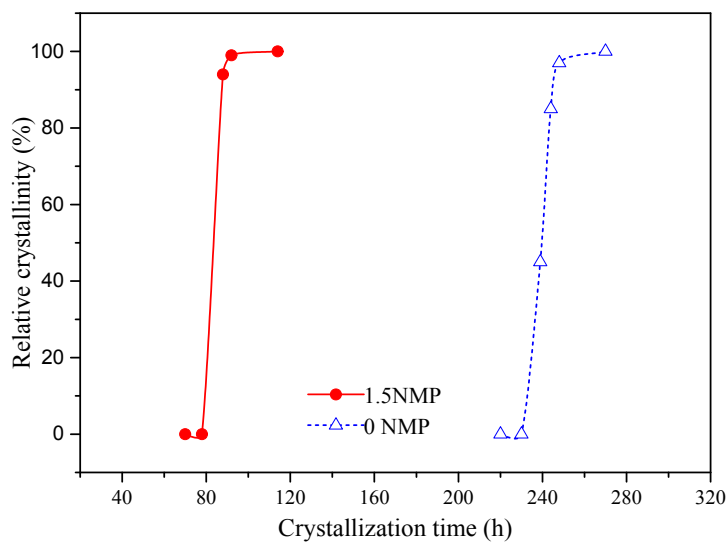

**Fig. S11** Crystallization curves of zeolite ZSM-11 synthesized with and without NMP under TBAOH as OSDAs at 130 °C.

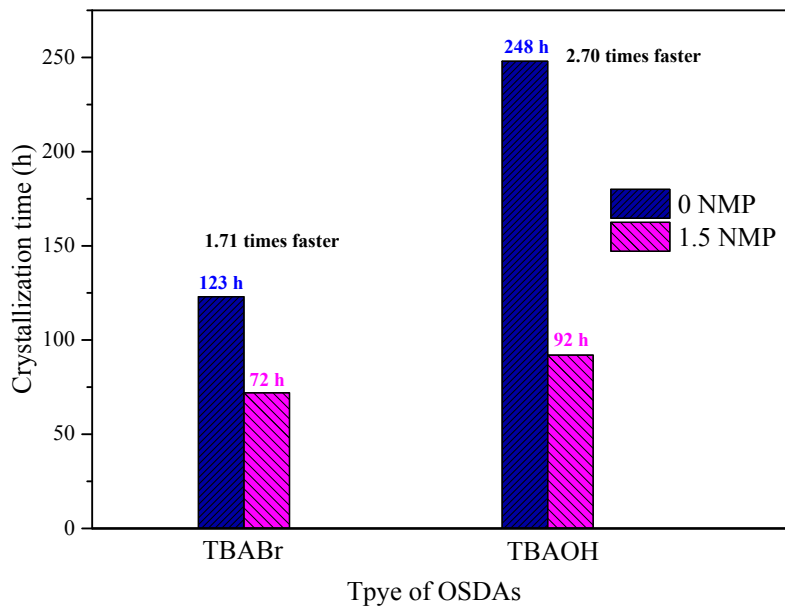

**Fig. S12** Type of OSDAs dependence of acceleration effect of NMP.

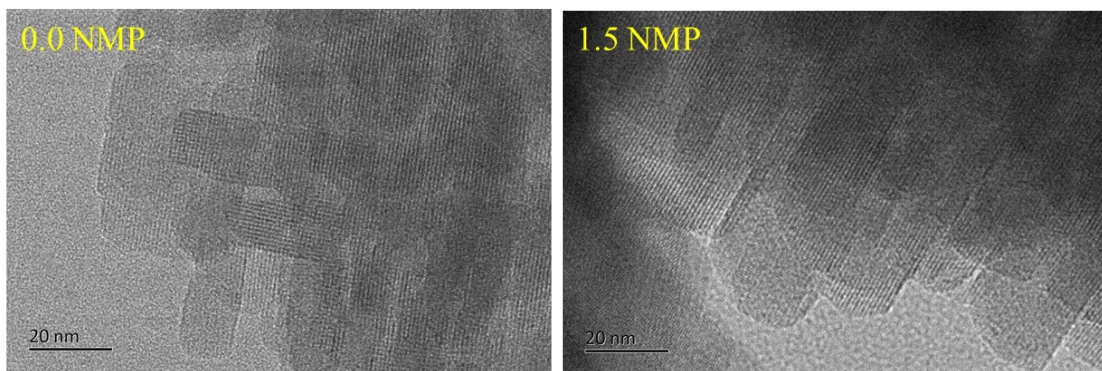

**Fig. S13** TEM images of samples crystallized at 130 °C with NMP/SiO<sub>2</sub> molar ratio of 0.0.

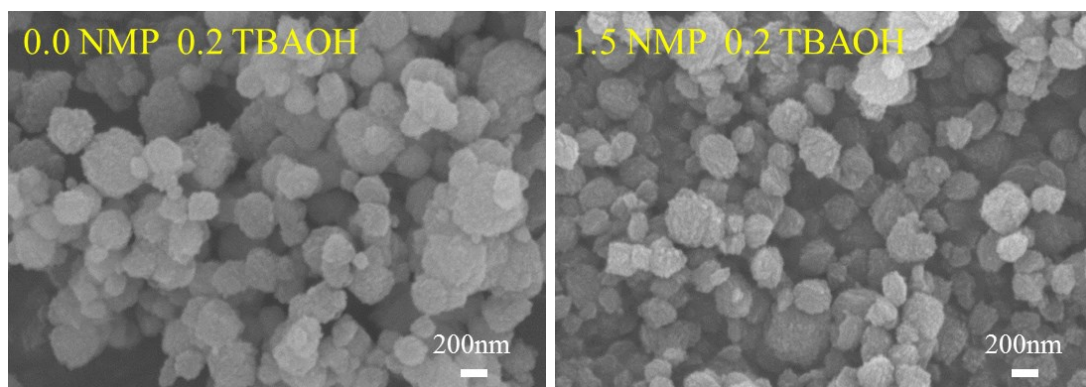

**Fig. S14** SEM images of samples crystallized at 130 °C for with NMP/SiO<sub>2</sub> molar ratio of 0.0 and 1.5.

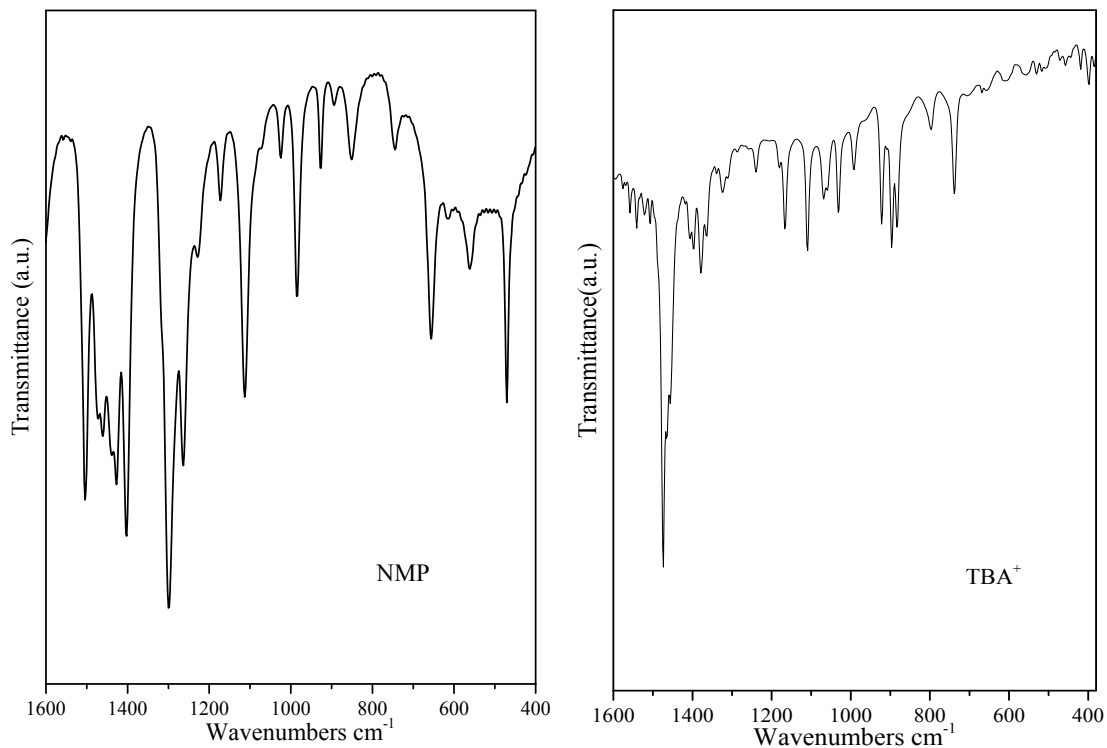

**Fig. S15** FT-IR spectra of NMP and  $\text{TBA}^+$ .

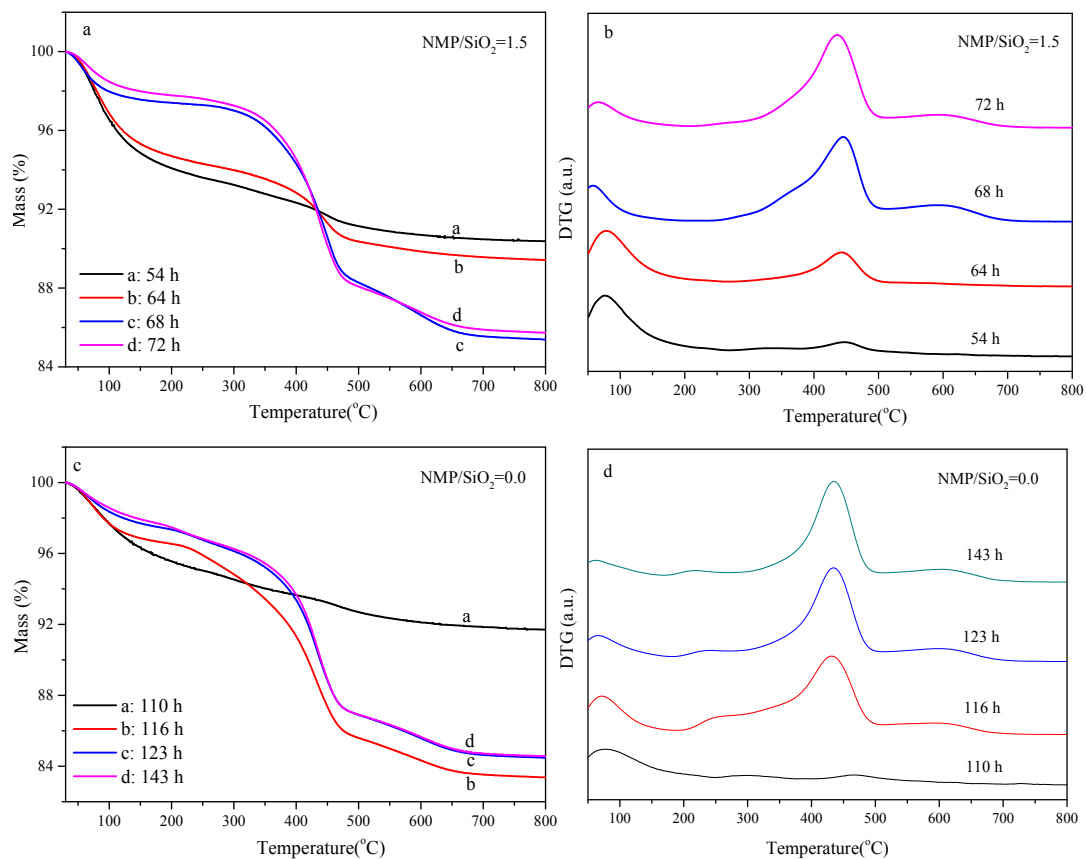

**Fig. S16** TG and DTG curves for the samples synthesized with (a, b) and without NMP (c, d).



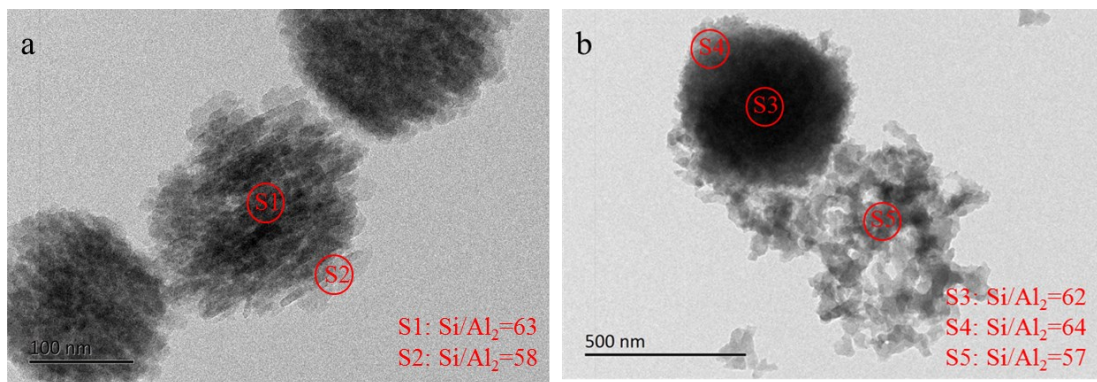

**Fig. S17** TEM-EDS analyses of the samples synthesized (a) without NMP for 116h and (b) with NMP (NMP/SiO<sub>2</sub>=1.5)

for 64h.

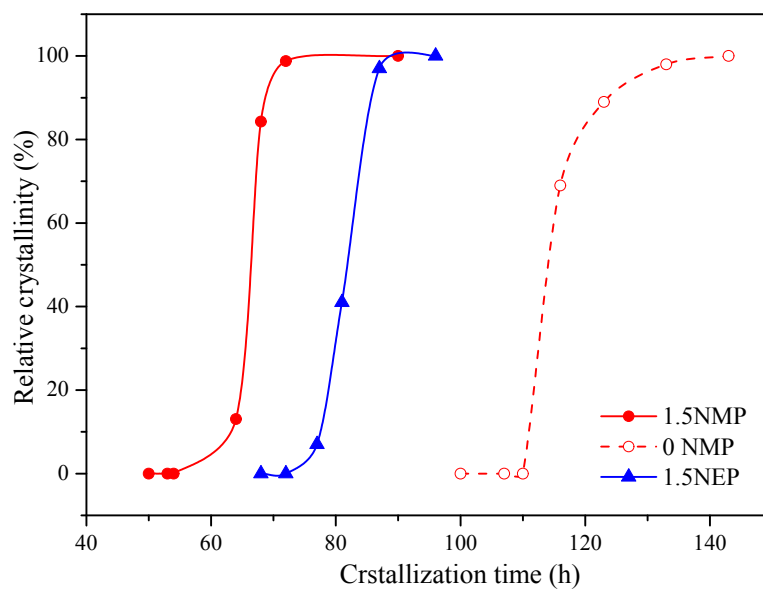

**Fig. S18** Crystallization curves of zeolite ZSM-11 synthesized with NMP or NEP and without NMP under TBABr/ SiO<sub>2</sub>=

0.2 at 130 °C.

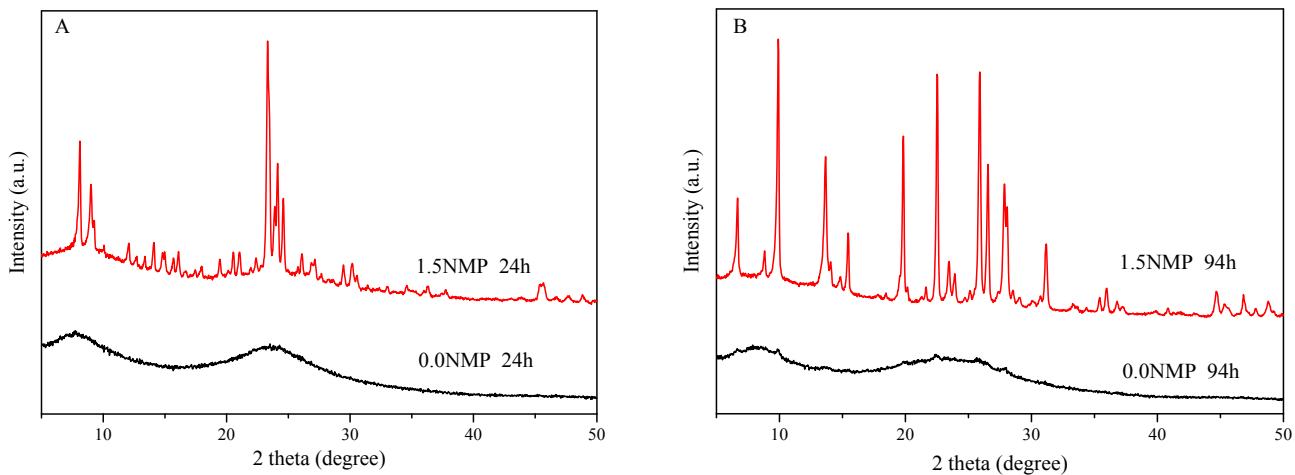

**Fig. S19** XRD patterns of MFI (A) and MOR (B) zeolite synthesized with and without NMP.

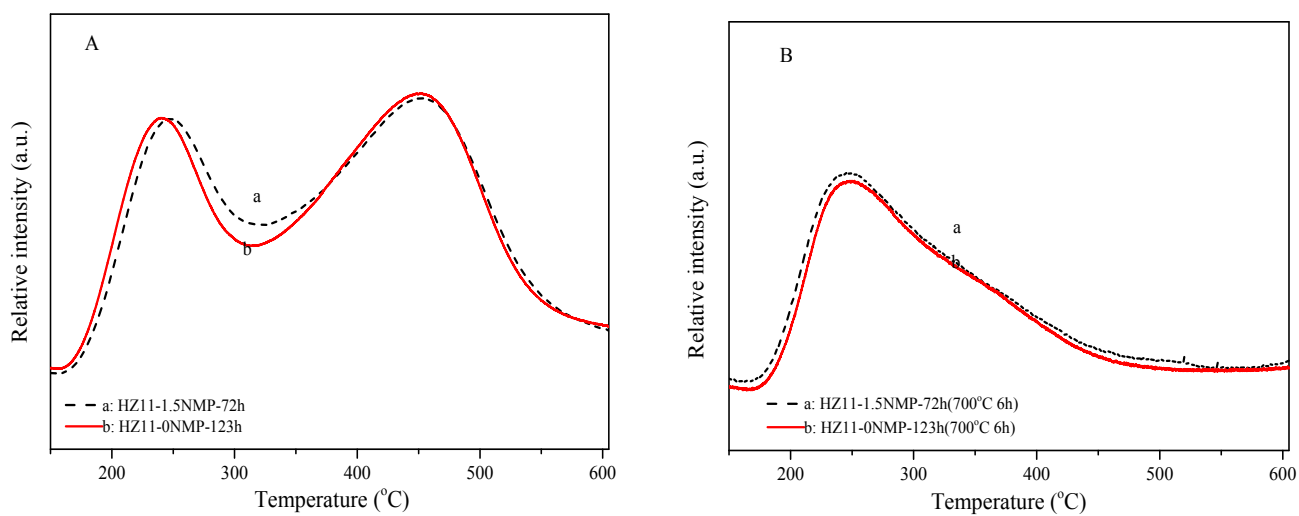

**Fig. S20** NH<sub>3</sub>-TPD profiles of samples before (A) and after (B) steam treatment at 700°C for 6 h.

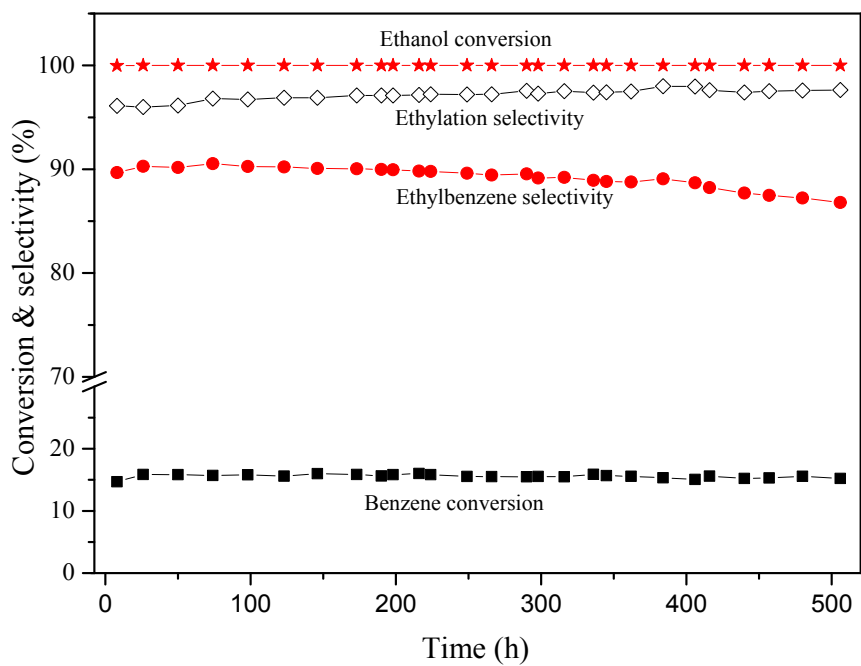

**Fig. S21** Conversion and product selectivity of benzene-ethanol alkylation reaction as a function of time over HZ11-1.5NMP-72h.

Reaction condition:  $m(\text{catalyst}) = 0.5\text{g}$ ;  $380\text{ }^\circ\text{C}$ ;  $1.5\text{MPa}$ ;  $\text{WHSV}(\text{ethanol}) = 1.0\text{h}^{-1}$ ;  $n(\text{benzene})/n(\text{ethanol}) = 6/1$ .

**Table S1** The raw material, electricity and labor costs.

|                    | Raw material <sup>a</sup> |               |              |                           |                         |             | Electricity & Labor costs (¥/h) |
|--------------------|---------------------------|---------------|--------------|---------------------------|-------------------------|-------------|---------------------------------|
|                    | Silica sol (¥/ton)        | TBABr (¥/ton) | NaOH (¥/ton) | Aluminium sulfate (¥/ton) | Deionized water (¥/ton) | NMP (¥/ton) |                                 |
| Price <sup>b</sup> | 4000                      | 30000         | 4000         | 1000                      | 10                      | 7000        | 200                             |

<sup>a</sup>: Raw material specifications were same as those used in the experimental section of this paper.

<sup>b</sup>: The costs of raw materials, electricity and labor were supplied by Zibo Qichuang Chemical Technology Development Co. Ltd, Chain in 2019.

**Table S2** The theoretical production costs of 500kg ZSM-11 zeolites in 12 m<sup>3</sup> synthetic reactor.

| Products              |              | Raw material |       |      |                   |                 |      | Sum   | Crystallization time (h) | Electricity & Labor costs (¥) | Total production cost (¥) |
|-----------------------|--------------|--------------|-------|------|-------------------|-----------------|------|-------|--------------------------|-------------------------------|---------------------------|
|                       |              | Silica sol   | TBABr | NaOH | Aluminium sulfate | Deionized water | NMP  |       |                          |                               |                           |
| Z11-0NMP(0.2TBABr)    | Dosages (kg) | 1600         | 525   | 95   | 89                | 4700            | 0    | 7009  | 123                      | 24600                         | 47266                     |
|                       | Price (¥)    | 6400         | 15750 | 380  | 89                | 47              | 0    | 22666 |                          |                               |                           |
| Z11-1.5NMP(0.2TBABr)  | Dosages (kg) | 1600         | 525   | 95   | 89                | 4700            | 1223 | 8232  | 72                       | 14400                         | 45627                     |
|                       | Price (¥)    | 6400         | 15750 | 380  | 89                | 47              | 8561 | 31227 |                          |                               |                           |
| Z11-0NMP(0.02TBABr)   | Dosages (kg) | 1600         | 53    | 95   | 89                | 4700            | 0    | 6537  | 145                      | 29000                         | 37506                     |
|                       | Price (¥)    | 6400         | 1590  | 380  | 89                | 47              | 0    | 8506  |                          |                               |                           |
| Z11-1.5NMP(0.02TBABr) | Dosages (kg) | 1600         | 53    | 95   | 89                | 4700            | 1223 | 7760  | 75                       | 15000                         | 32067                     |
|                       | Price (¥)    | 6400         | 1590  | 380  | 89                | 47              | 8561 | 17067 |                          |                               |                           |

**Table S3** XRF results of samples crystallized for different periods of time with and without NMP.

| NMP/SiO <sub>2</sub> = 1.5 |                    | NMP/SiO <sub>2</sub> = 0.0 |                    |
|----------------------------|--------------------|----------------------------|--------------------|
| Time /h                    | Si/Al <sub>2</sub> | Time /h                    | Si/Al <sub>2</sub> |
| 0                          | 46.4               | 0                          | 45.6               |
| 64                         | 49.5               | 116                        | 47.3               |
| 68                         | 52.0               | 123                        | 48.8               |
| 72                         | 52.3               | 143                        | 49.2               |
| 90                         | 52.1               | -                          | -                  |

**Table S4** XRF results of samples crystallized for different periods of time with and without NMP.

| The Si/Al <sub>2</sub> ratio of the initial gel | The Si/Al <sub>2</sub> ratio of the ZSM-11 |             |
|-------------------------------------------------|--------------------------------------------|-------------|
|                                                 | With NMP                                   | Without NMP |
| 40                                              | 34.1                                       | 33.3        |
| 60                                              | 52.1                                       | 49.2        |
| 400                                             | 288.3                                      | 255.4       |
| 2600                                            | 1841.6                                     | 1241.8      |

**Table S5** Kinetics parameters of ZSM-11 crystallization with NMP and without NMP.

| T(°C) | NMP/SiO <sub>2</sub> = 1.5 |                                      |                                   |                            |                            | NMP/SiO <sub>2</sub> = 0.0 |                                      |                                   |                            |                            |
|-------|----------------------------|--------------------------------------|-----------------------------------|----------------------------|----------------------------|----------------------------|--------------------------------------|-----------------------------------|----------------------------|----------------------------|
|       | t <sub>0</sub><br>(h)      | V <sub>n</sub><br>(h <sup>-1</sup> ) | V <sub>g</sub> (h <sup>-1</sup> ) | E <sub>n</sub><br>(kJ/mol) | E <sub>g</sub><br>(kJ/mol) | t <sub>0</sub><br>(h)      | V <sub>n</sub><br>(h <sup>-1</sup> ) | V <sub>g</sub> (h <sup>-1</sup> ) | E <sub>n</sub><br>(kJ/mol) | E <sub>g</sub><br>(kJ/mol) |
| 130   | 58                         | 0.0172                               | 10.70                             |                            |                            | 113                        | 0.0089                               | 11.50                             |                            |                            |
| 140   | 39                         | 0.0256                               | 28.00                             | 62.6                       | 136.4                      | 66                         | 0.0152                               | 27.00                             | 91.8                       | 134.1                      |
| 150   | 23                         | 0.0435                               | 73.00                             |                            |                            | 31                         | 0.0323                               | 76.00                             |                            |                            |

**Table S6** Textural data of samples before and after steam treatment.

| Samples                       | Si/Al <sub>2</sub><br>molar ratio | Textural data                                       |                                                     |                                                        |                                                       |
|-------------------------------|-----------------------------------|-----------------------------------------------------|-----------------------------------------------------|--------------------------------------------------------|-------------------------------------------------------|
|                               |                                   | S <sub>BET</sub><br>/m <sup>2</sup> g <sup>-1</sup> | S <sub>ext</sub><br>/m <sup>2</sup> g <sup>-1</sup> | V <sub>micro</sub><br>/cm <sup>3</sup> g <sup>-1</sup> | V <sub>meso</sub><br>/cm <sup>3</sup> g <sup>-1</sup> |
| HZ11-0NMP-123h-130            | 49.2                              | 468                                                 | 168                                                 | 0.121                                                  | 0.442                                                 |
| HZ11-0NMP-123h-130(700°C 6h)  | -                                 | 385                                                 | 135                                                 | 0.101                                                  | 0.439                                                 |
| HZ11-1.5NMP-72h-130           | 52.1                              | 472                                                 | 130                                                 | 0.136                                                  | 0.167                                                 |
| HZ11-1.5NMP-72h-130(700°C 6h) | -                                 | 367                                                 | 103                                                 | 0.106                                                  | 0.223                                                 |
